# Supplementary material
Source: PubMed Central journal article supplement (PMC7923669)
Supplement: pnas.2015224118.sapp.pdf [file pnas.2015224118.sapp.pdf]

# PNAS

[www.pnas.org](http://www.pnas.org)

**Supplementary Information for**

“Dual-purpose isocyanides produced by *Aspergillus fumigatus* contribute to cellular copper sufficiency and exhibit antimicrobial activity”

Nicholas Raffa , Tae Hyung Won , Andrew Sukowaty , Kathleen Candor , Chengsen Cui , Saayak Halder , Mingji Dai , Julio A. Landero Figueroa , Frank C. Schroeder , Nancy P. Keller

Nancy P. Keller  
Email: [npkeller@wisc.edu](mailto:npkeller@wisc.edu)

**This PDF file includes:**

Supplementary text  
Figures S1 to S11(not allowed for Brief Reports)  
Tables S1 to S5 (not allowed for Brief Reports)  
SI References

## Supplementary Information Text

### Materials and Methods

#### Mutant construction

Double-joint PCR was used to generate DNA constructs for transformation described previously (1). DNA constructs containing the *pyrG* or *argB* selectable marker fused to 1 kB homologous regions flanking the gene of interest that insert via homologous recombination. Flanks were amplified with 20 bp overlaps using primers designed using SeqBuilder (DNASTAR, Madison, WI). Selectable markers were amplified from either the pJW24 (*pyrG*) (2) or pJMP4 (*argB*) (3) plasmids. Deletion mutants were constructed by whole-gene deletion and overexpression mutants were created by inserting a constitutively active *A. nidulans gpdA* promoter upstream of the ATG translation start site of a gene. The DNA constructs were transformed into the *pyrG* auxotroph TFYL 80.1 via PEG transformation described previously (1). For double mutants, the double auxotroph TFYL 44.1 (*pyrG*<sup>-</sup> and *argB*<sup>-</sup>) was first transformed with either the overexpression or deletion *xanC* construct and upon successful transformation, further transformed with a DNA deletion construct containing the *argB* marker. Resulting transformants were then screened via PCR using the 5' forward flank and the marker reverse primer. Positive mutants were further screened via southern blot analysis using P-32 labelled 1 kB flanking regions described previously to confirm single integrations (Figure S8).

#### Fungal Growth Conditions and Physiological Assays

Unless otherwise specified, *Aspergillus* strains were grown on glucose minimal medium (GMM)(4). *Aspergillus* strains were activated by streaking out on a plate of GMM from a glycerol stock. Spore stocks were generated by harvesting spores using 0.01% Tween 20 in ddH<sub>2</sub>O and gentle scrubbing using a L-shaped spreader. Spores were then filtered through sterile MiraCloth (Calbiochem) to remove debris and washed twice with Millipore-filtered water. Spore stocks were counted using a hemocytometer and diluted to the desired concentration. *Cryptococcus neoformans* H99 was grown on minimal media (15 mM D-glucose, 10 mM MgSO<sub>4</sub>, 29.4 mM KH<sub>2</sub>PO<sub>4</sub>, 13 mM glycine, 3 μM thiamine, and 1.5% (w/v) agar, pH 5.5) with 1 mM L-DOPA to induce melanization (Cayman Chemical) where

indicated. For testing response to varying levels of copper, GMM was prepared as described previously (5) without copper or EDTA. After autoclaving, copper or BCS was supplemented. Plates were inoculated with 2  $\mu$ l of spore suspension and the plates grown at 37 °C for 72 hours. For liquid shake cultures, 50 ml of GMM was inoculated with  $1 \times 10^6$  spores/ml and incubated at 37 °C, shaking at 250 rpm for 48 hours. Lyophilized mycelia were obtained by filtering cultures through MiraCloth, freezing in liquid nitrogen, and lyophilizing overnight. For sporulation assay, strains were suspended in 10 ml molten GMM and overlaid onto a plate of GMM. An agar plug was transferred to a solution of 0.01% Tween and homogenized. Samples were then diluted and spores were enumerated using a hemocytometer.

#### RNA Extraction and Quantitative RT-PCR

Liquid shake cultures were inoculated with  $1 \times 10^6$  spores/ml of wild type *A. fumigatus* and allowed to incubate at 37°C for 24 hours shaking at 250 rpm. Hydrogen peroxide was added to a final concentration of 6 mM and were allowed to continue incubate for an additional 3 hours. Total culture mycelia was then flash-frozen in liquid nitrogen and lyophilized. RNA was extracted using the QIAzol Lysis Reagent (Qiagen). RNA was then subjected to a DNase I digestion (New England Biolabs) and reverse-transcribed using iScript cDNA synthesis kit (Biorad). Semi-quantitative PCR was performed by amplifying the gene of interest via designed primers (Table S5) and using *A. fumigatus* actin as a loading control.

#### Chrome Azurol S Assay

Chrome azurol S (CAS) assay plates were made by adding 5 mL of sterile phosphate buffer (26 g/L  $\text{KH}_2\text{PO}_4$  and 62 g/L  $\text{Na}_2\text{HPO}_4 - 7\text{H}_2\text{O}$ ) and 100 ml of 10x CAS (0.5 mM  $\text{CuSO}_4$ , 0.5025 mM Chrome Azurol S (Sigma-Aldrich), 1.05 mM HDTMA) to 1 L of molten GMM. Upon solidifying, a sterile razor was used to remove half of the CAS media. 10 ml of warm molten GMM was then inoculated with  $1 \times 10^7$  spores and poured into the vacant space. The plates were then allowed to solidify and incubated for 5 days at 37 °C in the dark. The zone of activity was quantified by measuring the distance between the growing mycelia and the edge of the Cu-CAS complex with a ruler.

### Laccase Activity Assay

Approximately  $1 \times 10^7$  spores were inoculated on small plates of GMM for 48 hours at 37°C in the dark. 2,2'-azino-bis(3-ethylbenzothiazoline)-6-sulphonic acid (ABTS) (Sigma-Aldrich) stock solution was prepared by dissolving ABTS in 0.1 M sodium acetate buffer (pH 4.5). Plates were flushed with 10 ml of 1 mM ABTS and incubated at ambient temperature for 24 hours. 200  $\mu$ l aliquots of supernatant were transferred to a 96-well plate and measured the absorbance at 420 nm. Data were quantified and normalized to the negative control, uninoculated plates with the appropriate level of copper, flushed, and incubated with 1 mM ABTS.

### Metabolite Extraction

Strains were grown as an overlay culture, inoculating 10 ml of warm, molten GMM (containing 8 g/L agar) with  $1 \times 10^6$  spores and pouring onto a plate containing 20 ml of solidified GMM. Upon solidification, the plates were then incubated for 5 days at 37 °C. The plates were frozen using liquid nitrogen and lyophilized. The lyophilized samples were extracted with 20 ml of ethyl acetate-methanol (9:1) for 1.5 h with vigorous stirring. Extracts were filtered over cotton, evaporated to dryness, and stored in 4-ml vials. Crude extracts were suspended in 0.5 ml of methanol and centrifuged to remove insoluble materials, and the supernatant was analyzed by UHPLC-HRMS.

### HPLC-HRMS Analytical Methods and Equipment Overview

High-resolution HPLC-MS (HPLC-HRMS) was performed on a ThermoScientific-Dionex Ultimate 3000 UHPLC system equipped with a diode array detector and connected to a ThermoScientific Q Exactive Orbitrap mass spectrometer operated in electrospray positive (ESI<sup>+</sup>) or electrospray negative (ESI<sup>-</sup>) ionization mode. An Agilent Zorbax RRHD Eclipse XDB-C18 column (2.1  $\times$  100 mm, 1.8  $\mu$ m particle diameter) was used with acetonitrile (organic phase) and 0.1% formic acid in water (aqueous phase) as solvents at a flow rate of 0.5 mL/min. A solvent gradient scheme was used, starting at 2% organic for 1 min, followed by a linear increase to 100% organic over 14 min, holding at 100% organic for 2.5 min, decreasing back to 2% organic for 0.1 min and holding at 2% organic for the final 1.4 min, for a total of 18 min.

## ICP-MS

The spores and mycelia were analyzed by ICP-MS after acid digestion. 100  $\mu$ l of concentrated trace metal grade nitric acid, 50  $\mu$ l of 18 M $\Omega$  water and 25  $\mu$ l of 500 ng/ml of scandium used as internal standard solution were added to the samples in a metal free 5 ml conical vial. After the digestion was carried out in a heating block at 90 °C for 2 hours with venting every 20 minutes. The samples were brought to 2.5 ml with 18 M $\Omega$  water. The samples were then analyzed for total Cu content in an Agilent 7500 ICP-MS system with a Cetac ASX-520 auto sampler contained in an acrylic box. The ICP-MS system was configured with a Micromist nebulizer, a double pass Scott spray chamber held at 2 °C, a 2.5 mm torch with platinum shield torch, and nickel sample and skimmer cones. The instrument was run with 3.5 ml/min of helium in energy discrimination mode. The external calibration method was used with a calibration range of 0.05 to 25 ng/ml. The mass of the samples (200-800  $\mu$ g) needed for the quantification of Cu was calculated by measuring the phosphorous content in the digested samples according to (6).

## Total Synthesis of Xanthocillin

Synthetic xanthocillin was prepared in 10 steps from commercially available 4-hydroxybenzaldehyde by following the approach developed by Tatsuta and co-workers (7). The NMR and HRMS data of the synthetic sample (Figure S7) match with the reported ones. Pure synthetic xanthocillin sample was obtained after column chromatography for the corresponding biological evaluations.

## Xanthocillin synthesis

To a solution of xanthocillin silyl ether (prepared using the reported approach;<sup>7</sup> 12 mg, 0.023 mmol) in THF (1 mL) at 0 °C under an atmosphere of argon was added TBAF/AcOH (90  $\mu$ L, 1: 1/mol: mol, 0.09 mmol, premixed) dropwise. The reaction mixture was stirred at 0 °C for 30 min and then warm up to room temperature for 10 min. The reaction mixture was purified as it was by column chromatography (silica gel, 10-35% EtOAc in hexane) to provide xanthocillin (5 mg, 76% yield) as a yellow solid.  $R_f$  = 0.27 (33% EtOAc in hexane); IR (film) 3275, 2131, 1593, 1515, 1434,  $\text{cm}^{-1}$ ;  $^1\text{H}$  NMR (500 MHz,  $\text{CD}_3\text{OD}$ )  $\delta$  7.73 (d,

$J=8.5$ , 4H), 7.00 (s, 2H), 6.88 (d,  $J=8.5$ , 4H);  $^{13}\text{C}$  NMR (125 MHz,  $\text{CD}_3\text{OD}$ )  $\delta$  174.6, 161.0, 133.0, 128.7, 125.0, 116.9, 116.7; HRMS (ESI): calcd for  $\text{C}_{18}\text{H}_{13}\text{N}_2\text{O}_2$  (M+H) $^+$  289.0977, found 289.0972. The  $^1\text{H}$  and  $^{13}\text{C}$  NMR spectra of synthetic xanthocillin were recorded on a 500 MHz NMR spectrometer in  $\text{CD}_3\text{OD}$ , with residual  $\text{CH}_3\text{OH}$  signal(s) as the internal reference. Chemical shifts are reported as  $\delta$  values (ppm). The solvent peaks are set as follows:  $\text{CH}_3\text{OH}$  at  $\delta$  3.31 and  $\delta$  49.0 ppm for  $^1\text{H}$  and  $^{13}\text{C}$  NMR. Chemical shifts are reported as follows: s = singlet, d = doublet. IR spectra were taken on an FT-IR spectrophotometer. High-resolution mass spectra (HRMS) were measured by the  $\square$ ESI method. Silica gel was used for flash column chromatography with mixed ethyl acetate (EtOAc) and hexane as the eluting solvents. Yields refer to chromatographically and spectroscopically ( $^1\text{H}$  NMR) homogeneous materials. Anhydrous THF was freshly distilled from sodium benzophenone ketyl under argon. Other reagents were obtained commercially and used as received.

#### Cocultures and Growth Conditions

*Candida albicans*, *Staphylococcus aureus*, *Salmonella enterica*, *Pseudomonas aeruginosa* (PAK), and *Pseudomonas aeruginosa* (PAO1) were activated from glycerol stock onto plates of lysogeny broth (LB) or yeast peptone dextrose (YPD), streaking for single colonies. A single colony was then selected and inoculated into 5 ml of liquid LB or YPD, shaking at 37 °C overnight. Coculture experiments were performed by transferring GMM agar plugs of an actively growing overlay fungal culture to solid LB containing 16 g/L agar. An overlay of the bacteria/fungi was generated by suspending microorganisms to a final O.D.<sub>600</sub> of 0.05 in 10 ml of molten top agar and dispensing onto the LB containing the agar plugs. The plates were then incubated overnight at either 37 °C in the case of the bacterial strains or 30 °C in the case of the *Candida albicans*. Zones of inhibition were visually evaluated to determine inhibition of growth. For cocultures involving *Aspergillus nidulans*, GMM containing various levels of copper was inoculated with  $1 \times 10^7$  spores of *A. nidulans* and preincubated for one day at 37 °C. The plates were then inoculated with  $1 \times 10^7$  spores of the *xan* mutant strains and incubated for an additional three days at 37 °C. For 96-well plate assays, overnight cultures were diluted to an O.D.<sub>600</sub> of 0.05 in liquid LB and 190  $\mu\text{l}$  was dispensed into a well containing 10  $\mu\text{l}$  of the corresponding

extract/xanthocillin. The plate was then incubated at 37 °C. Growth was tracked by checking the O.D.<sub>600</sub> at 48 hours. For assays involving the addition of metals, filter-sterilized 1000x stocks were diluted in LB prior to dispensing into 96-well plates.

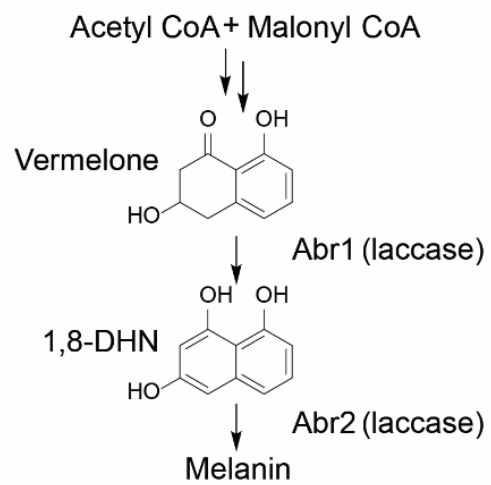

Figure S1 – Biosynthetic pathways of DHN-melanin in *A. fumigatus*.



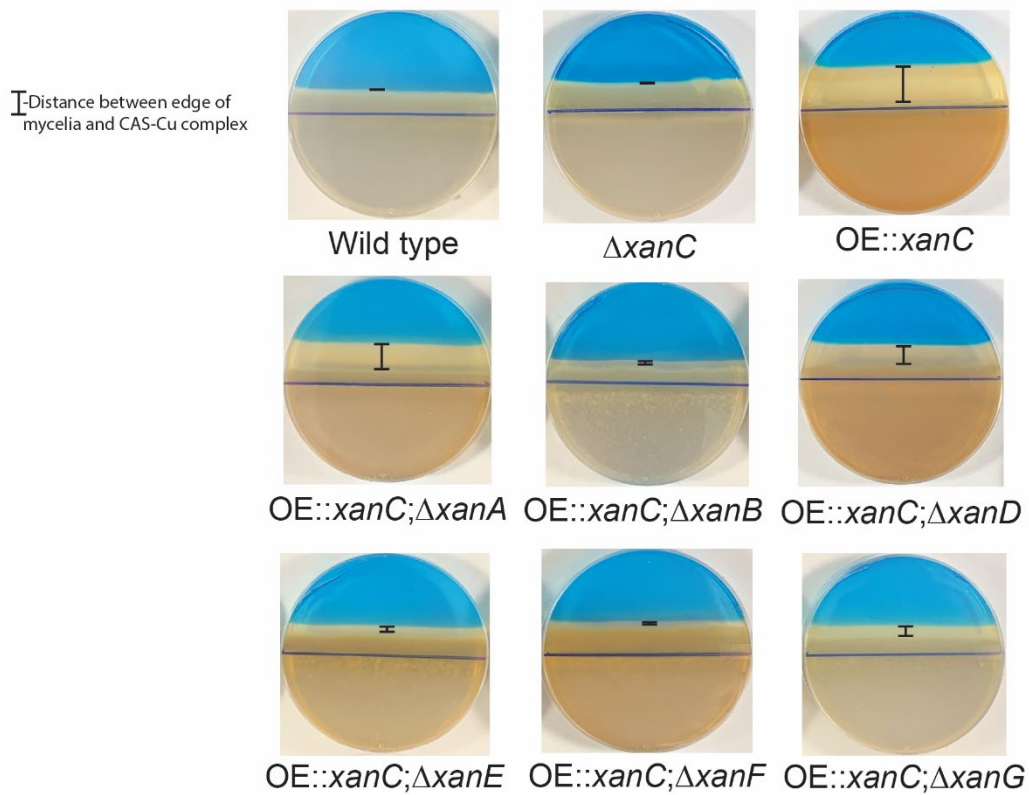

Figure S2- CAS assay for detection of secreted copper-binding molecules. Displayed are representative images of the CAS assay results. Measured distances of the zone of activity are indicated. Zone of activity is defined as the distance between the edge of the growing mycelia and the CAS-Cu complex.

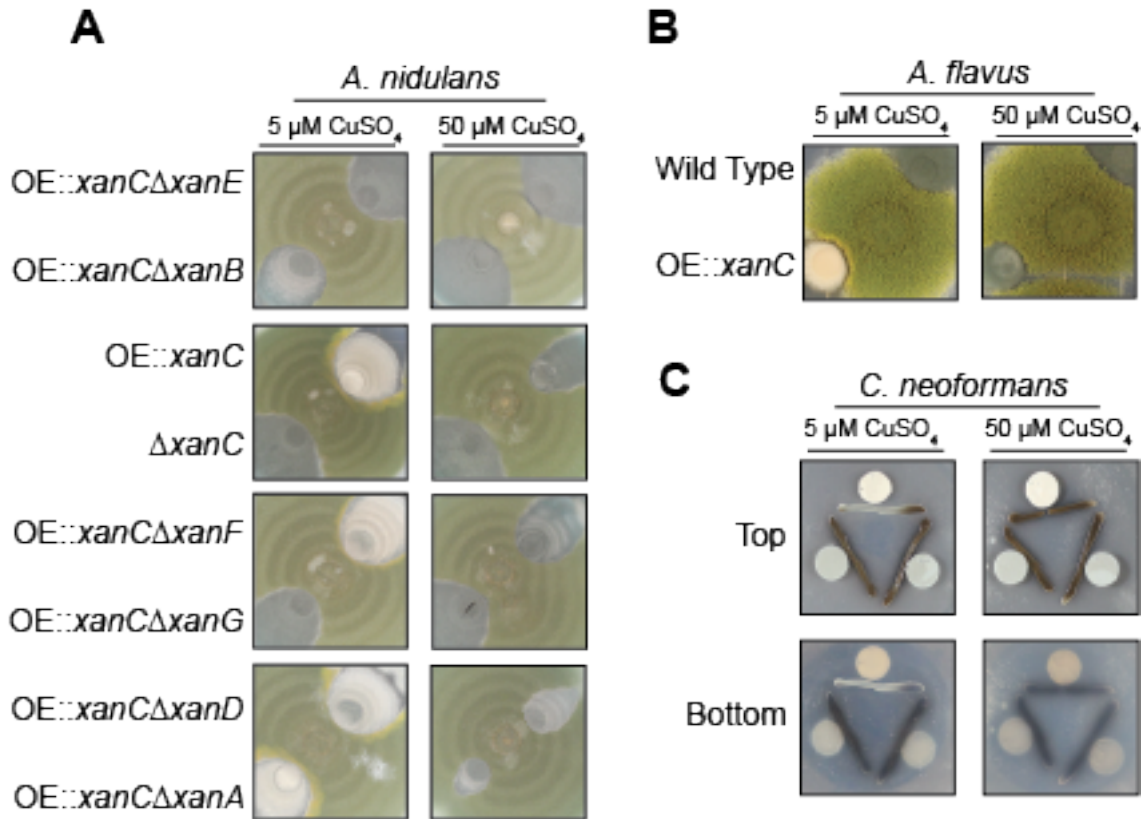

Figure S3- Cocultures of *xan* double mutants with A.) *Aspergillus nidulans*, B.) *Aspergillus flavus*, and C.) *Cryptococcus neoformans* H99.

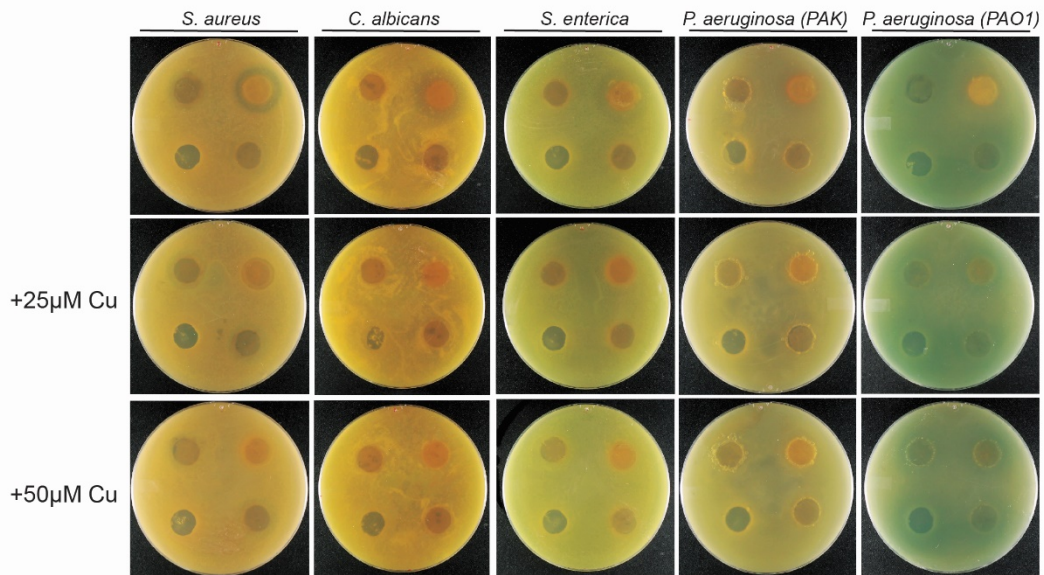

Figure S4 – *xan* mutant antimicrobial assay. Agar plugs of actively growing *xanC* mutants were transferred to a plate of lysogeny agar containing the indicated microbe (Top of figure) and supplemented with copper (Left of figure). Per-plate: Top left- WT, top right - OE::*xanC*, bottom left  $\Delta xanC$ , bottom right- negative control (GMM).

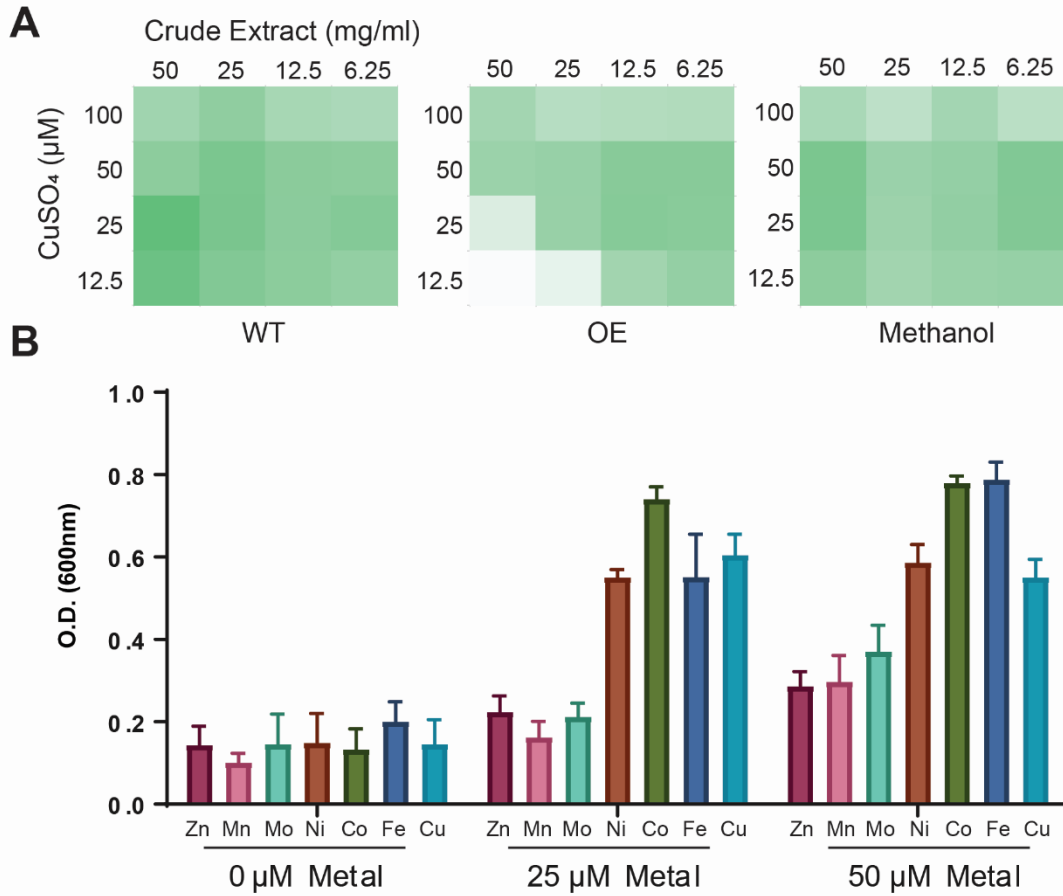

Figure S5 – *Pseudomonas aeruginosa* PAO1 challenged with *xan* mutant extracts. A.) Heat map indicating the relative growth of *P. aeruginosa* when challenged with crude extract (x-axis) and supplemented with copper (y-axis). Wild type, OE::*xanC* extract, or negative control is indicated at the bottom of the map. B.) Response of *P. aeruginosa* challenged with OE::*xanC* extract and supplemented with metals. Shown is the mean of three replicates with the SEM indicated by the error bars.

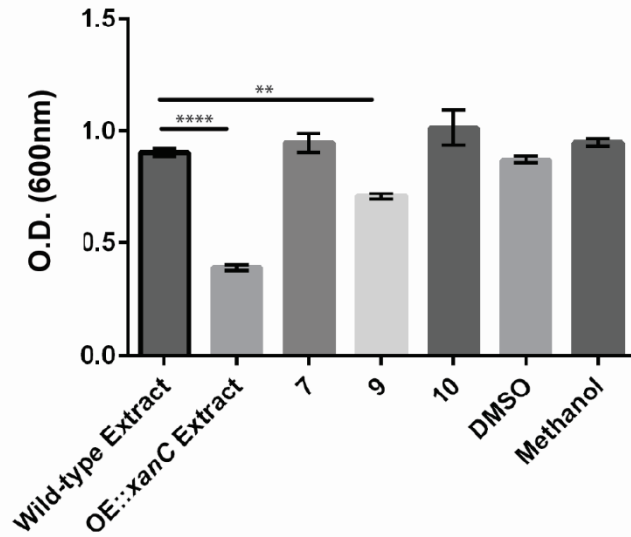

Figure S6- *Pseudomonas aeruginosa* PAO1 challenged with xanthocillin derivatives (256  $\mu\text{g/ml}$ ). Numbers are associated with the compounds in Figure 2. Shown is the mean of three technical replicates with the SEM indicated by the error bars. Statistical analysis was performed using an ANOVA. \*\* $P < 0.01$ , \*\*\*\* $P < 0.0001$ .

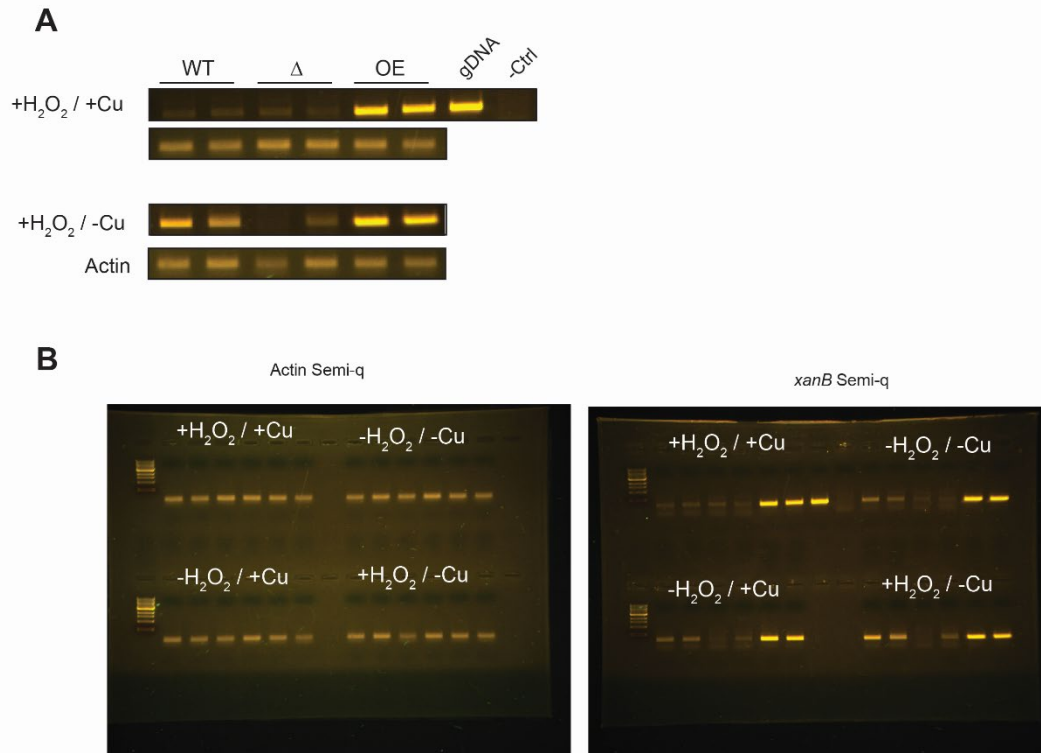

Figure S7- Semi-quantitative PCR of actin control (*act1*) (left) and *xanB* (right) in the indicated conditions. From left to right, samples were performed in duplicate wild type,  $\Delta xanC$ , OE::*xanC*. The *xanB* +H<sub>2</sub>O<sub>2</sub>/+Cu condition contains an additional genomic DNA positive control and negative control.

**<sup>1</sup>H NMR spectrum for Xanthocillin X**

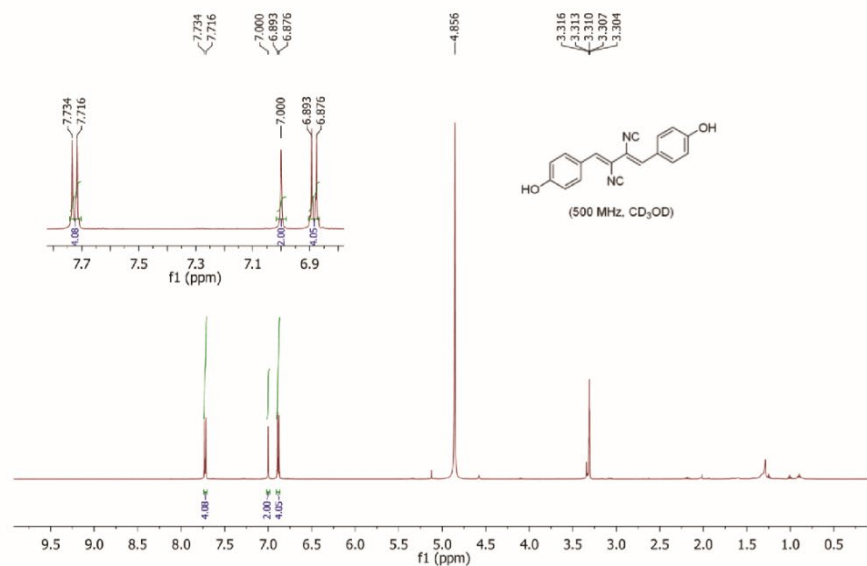

**<sup>13</sup>C NMR spectrum for Xanthocillin X**

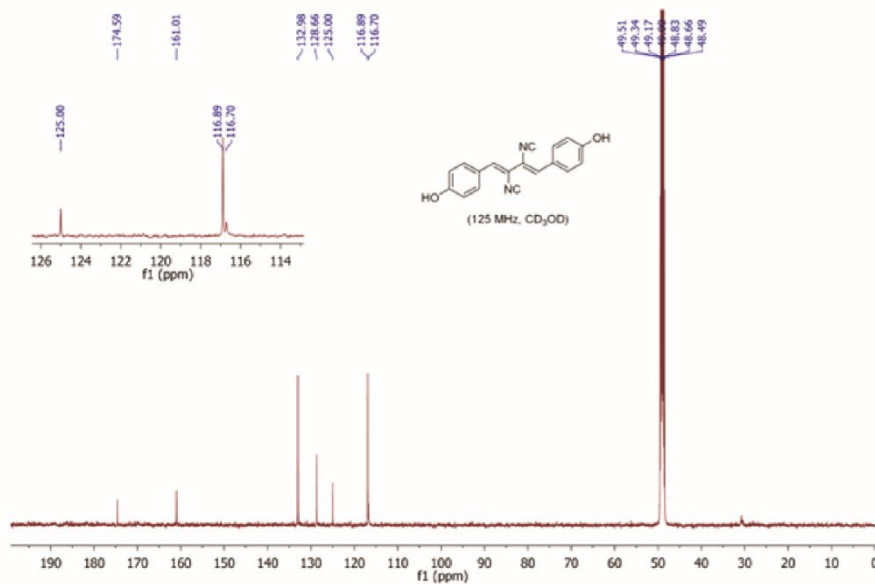

Figure S8- <sup>1</sup>H and <sup>13</sup>C NMR spectra of synthetic xanthocillin.

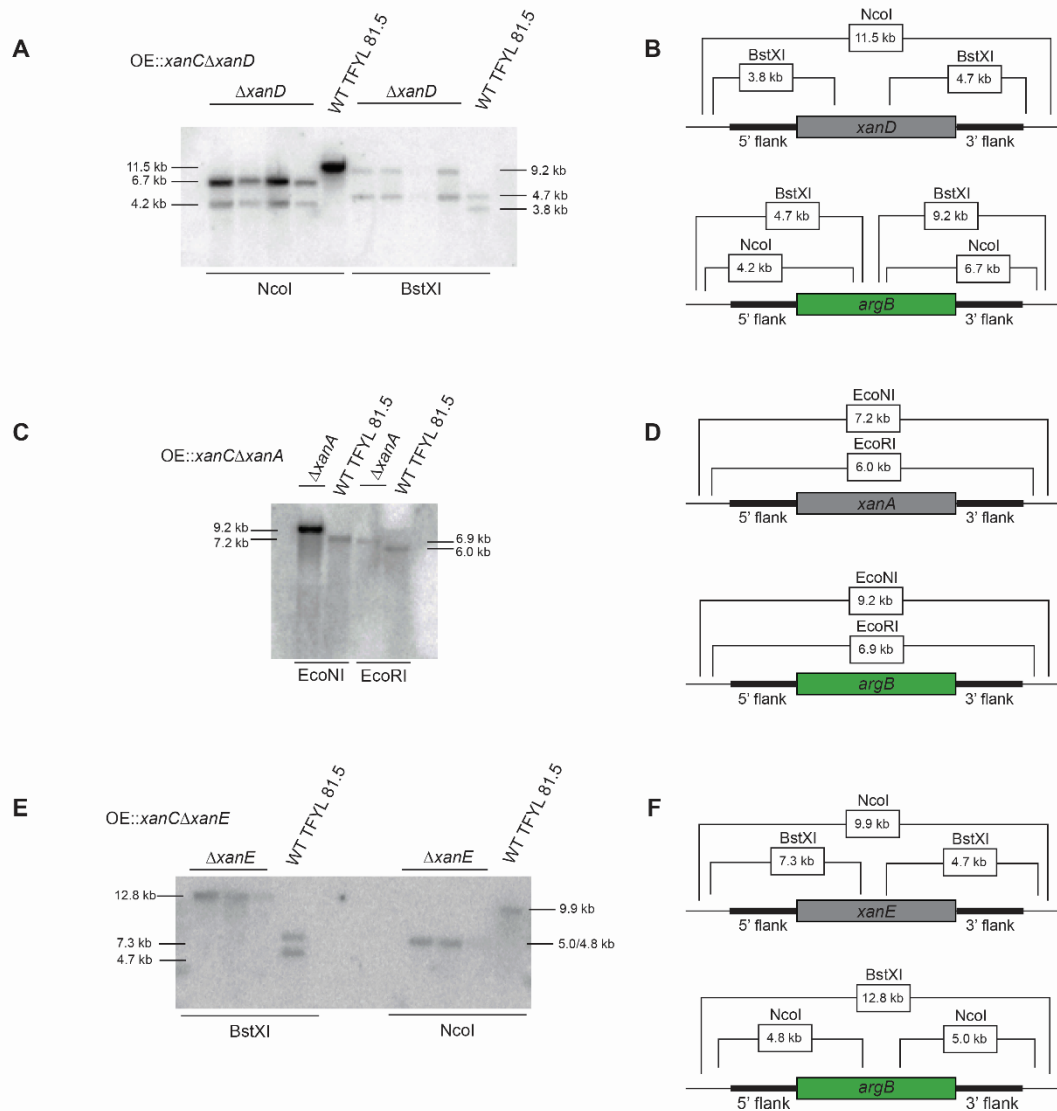

Figure S9- Southern Blot Confirmation analysis of the OE::*xanC*Δ*xanA*, OE::*xanC*Δ*xanD*, OE::*xanC*Δ*xanE* mutants used in this study. A.) Southern blot analysis of the OE::*xanC*Δ*xanD* mutant. B.) Digestion strategy of the OE::*xanC*Δ*xanD* mutant carried out with the designated restriction enzymes. C.) Southern blot analysis of the OE::*xanC*Δ*xanA* mutant. D.) Digestion strategy of the OE::*xanC*Δ*xanA* mutant carried out with the designated restriction enzymes. E.) Southern blot analysis of the OE::*xanC*Δ*xanE* mutant. B.) Digestion strategy of the OE::*xanC*Δ*xanE* mutant carried out with the designate restriction enzymes.



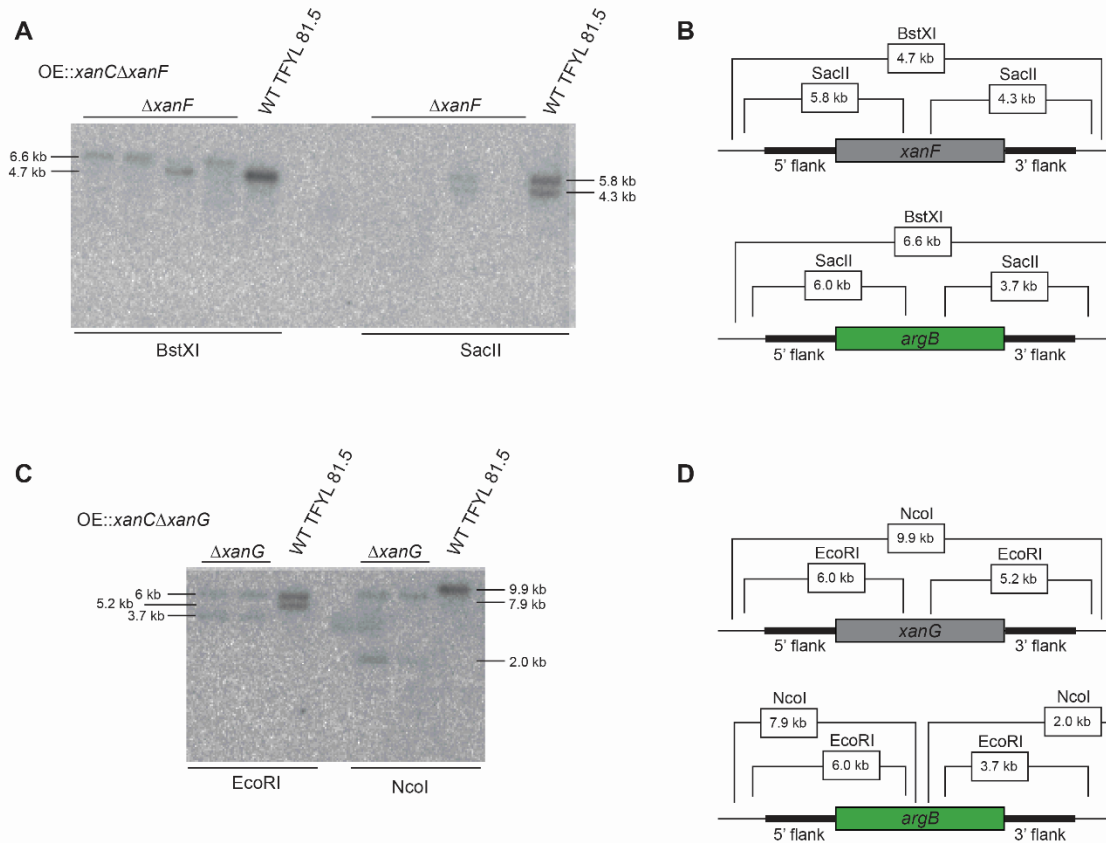

Figure S10- Southern Blot Confirmation analysis of the OE::*xanC*Δ*xanF* and OE::*xanC*Δ*xanG* mutants used in this study. A.) Southern blot analysis of the OE::*xanC*Δ*xanF* mutant. B.) Digestion strategy of the OE::*xanC*Δ*xanF* mutant carried out with the designated restriction enzymes. C.) Southern blot analysis of the OE::*xanC*Δ*xanG* mutant. D.) Digestion strategy of the OE::*xanC*Δ*xanG* mutant carried out with the designated restriction enzymes.

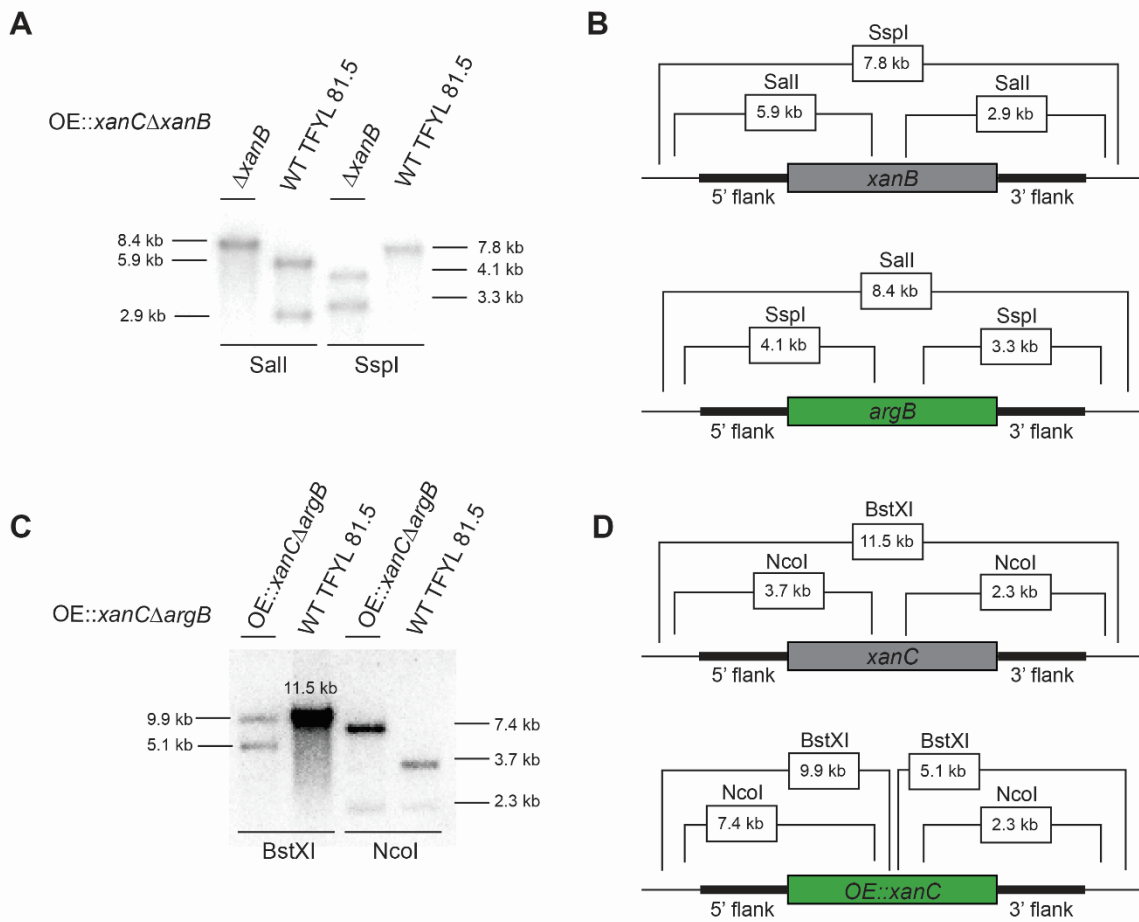

Figure S11- Southern Blot Confirmation analysis of the OE::*xanCΔxanB* and OE::*xanCΔargB* mutants used in this study. A.) Southern blot analysis of the OE::*xanCΔxanB* mutant. B.) Digestion strategy of the OE::*xanCΔxanB* mutant carried out with the designated restriction enzymes. C.) Southern blot analysis of the OE::*xanCΔargB* mutant. D.) Digestion strategy of the OE::*xanCΔargB* mutant carried out with the designated restriction enzymes.

Table S1- Production of xanthocillin derivatives comparing the OE::*xanC* mutants to deletion strains and WT.

| strain                         | Dehydrogenated formyl tyrosine (3) | BU-4704 <sup>a</sup> (5) | Xanthocillin X monomethyl ether <sup>a</sup> (6) | Fumiformamide (7) | <i>N,N</i> -((1 <i>Z</i> ,3 <i>Z</i> )-1,4-bis(4-methoxyphenyl)buta-1,3-diene-2,3-diyl)diforamide (8) | Melanocin E (9) | Melanocin F (10) |
|--------------------------------|------------------------------------|--------------------------|--------------------------------------------------|-------------------|-------------------------------------------------------------------------------------------------------|-----------------|------------------|
| WT                             | 8.3E5 ± 1.3E5                      | 2.4E9 ± 4.4E8            | 2.0E8 ± 4.5E7                                    | 3.2E6 ± 1.3E6     | 2.6E7 ± 8.5E6                                                                                         | 5.3E5 ± 2.6E5   | 2.0E7 ± 1.5E6    |
| OE:: <i>xanC</i>               | 2.5E6 ± 2.3E5                      | 1.3E10 ± 7.6E8           | 1.9E8 ± 1.3E7                                    | 5.0E9 ± 1.4E8     | 2.7E9 ± 1.3E8                                                                                         | 4.1E8 ± 2.7E7   | 3.3E9 ± 6.5E7    |
| OE:: <i>xanC</i> Δ <i>xanA</i> | 1.1E6 ± 1.4E5                      | 5.0E9 ± 9.1E8            | 1.3E8 ± 3.5E7                                    | 5.2E9 ± 9.4E8     | 1.8E9 ± 1.8E8                                                                                         | 5.7E8 ± 1.2E8   | 2.3E9 ± 1.1E8    |
| OE:: <i>xanC</i> Δ <i>xanB</i> | 0                                  | 0                        | 0                                                | 0                 | 0                                                                                                     | 0               | 0                |
| OE:: <i>xanC</i> Δ <i>xanD</i> | 1.0E7 ± 1.8E6                      | 9.3E9 ± 9.0E8            | 2.2E8 ± 3.3E7                                    | 5.8E9 ± 7.8E8     | 2.3E9 ± 7.2E7                                                                                         | 9.1E8 ± 1.7E8   | 2.6E9 ± 5.7E7    |
| OE:: <i>xanC</i> Δ <i>xanE</i> | 1.8E8 ± 8.0E7                      | 6.6E6 ± 3.1E6            | 8.7E4 ± 1.4E4                                    | 1.3E6 ± 1.7E5     | 2.6E7 ± 1.3E6                                                                                         | 0               | 1.4E7 ± 1.0E6    |
| OE:: <i>xanC</i> Δ <i>xanF</i> | 4.6E6 ± 5.5E5                      | 2.2E9 ± 3.1E8            | 6.5E7 ± 6.3E6                                    | 1.5E9 ± 4.0E8     | 2.3E9 ± 2.2E8                                                                                         | 3.0E7 ± 5.0E6   | 1.2E9 ± 9.9E7    |
| OE:: <i>xanC</i> Δ <i>xanG</i> | 1.8E8 ± 6.2E7                      | 0                        | 0                                                | 0                 | 0                                                                                                     | 0               | 0                |

<sup>a</sup>These compounds have an isocyanide functional group.

<sup>b</sup>The numbers indicate the average ± standard deviation for the peak intensity of each compound

Table S2- UHPLC-HRMS data for dehydrogenated formyl tyrosine.

| Compound                                    | HRESI(+/-) observed ( <i>m/z</i> ) | Ion                 | Calculated ion formula                                         | Calculated <i>m/z</i> | Retention time (min) |
|---------------------------------------------|------------------------------------|---------------------|----------------------------------------------------------------|-----------------------|----------------------|
| Dehydrogenated formyl tyrosine ( <b>3</b> ) | 230.04240                          | [M+Na] <sup>+</sup> | C <sub>10</sub> H <sub>9</sub> O <sub>4</sub> NNa <sup>+</sup> | 230.04238             | 3.7                  |

Table S3. Production of various fungal secondary metabolites in the OE::*xanC* mutant compared to deletion strains and wild type.

| Compounds                      | Ferricrocin   | Hydroxyferricrocin | Hydroxyl-terezine D | Gliotoxin <sup>a</sup> | Dimethyl gliotoxin | Fumagillin    |
|--------------------------------|---------------|--------------------|---------------------|------------------------|--------------------|---------------|
| WT                             | 6.8E7 ± 7.1E6 | 4.5E7 ± 5.2E6      | 1.9E8 ± 3.1E7       | 2.4E5 ± 1.7E5          | 1.1E7 ± 7.2E6      | 1.0E9 ± 2.0E8 |
| OE:: <i>xanC</i>               | 1.4E8 ± 6.4E6 | 5.8E7 ± 4.6E6      | 1.2E8 ± 6.8E6       | 0                      | 0                  | 3.5E8 ± 2.7E7 |
| OE:: <i>xanC</i> Δ <i>xanA</i> | 1.5E8 ± 2.9E6 | 4.5E7 ± 2.3E6      | 1.6E8 ± 2.4E7       | 0                      | 0                  | 3.7E8 ± 3.3E7 |
| OE:: <i>xanC</i> Δ <i>xanB</i> | 1.6E8 ± 1.3E7 | 3.2E7 ± 3.9E6      | 7.7E7 ± 1.0E7       | 0                      | 0                  | 5.0E8 ± 1.4E7 |
| OE:: <i>xanC</i> Δ <i>xanD</i> | 1.6E8 ± 1.3E7 | 4.5E7 ± 9.0E8      | 1.4E8 ± 1.4E7       | 0                      | 0                  | 3.7E8 ± 5.2E7 |
| OE:: <i>xanC</i> Δ <i>xanE</i> | 1.0E8 ± 5.0E6 | 4.0E7 ± 4.6E5      | 1.0E8 ± 3.2E6       | 0                      | 0                  | 2.9E8 ± 1.0E6 |
| OE:: <i>xanC</i> Δ <i>xanF</i> | 1.2E8 ± 6.7E6 | 5.5E7 ± 2.0E6      | 7.9E7 ± 8.3E6       | 0                      | 0                  | 1.7E8 ± 2.0E7 |
| OE:: <i>xanC</i> Δ <i>xanG</i> | 8.2E7 ± 5.1E6 | 2.2E7 ± 1.1E6      | 1.4E8 ± 8.3E6       | 0                      | 0                  | 3.4E8 ± 5.2E6 |

| Compounds-continued            | Pyripyropene A | Fumigaclavine A | Fumigaclavine C | Fumitremorgine C | Fumiquinazoline F | Fumiquinazoline H |
|--------------------------------|----------------|-----------------|-----------------|------------------|-------------------|-------------------|
| WT                             | 7.1E5 ± 2.5E5  | 5.2E9 ± 8.3E8   | 3.6E10 ± 6.6E9  | 2.7E7 ± 2.6E6    | 1.0E9 ± 1.7E8     | 1.1E6 ± 5.3E5     |
| OE:: <i>xanC</i>               | 1.1E6 ± 4.7E4  | 1.7E9 ± 9.8E7   | 6.7E10 ± 2.0E9  | 7.2E6 ± 4.6E5    | 2.8E9 ± 1.8E8     | 7.5E5 ± 8.1E4     |
| OE:: <i>xanC</i> Δ <i>xanA</i> | 3.8E5 ± 5.8E4  | 3.0E9 ± 4.0E8   | 5.9E10 ± 7.1E9  | 8.0E6 ± 8.4E5    | 1.4E9 ± 1.2E8     | 1.5E6 ± 4.1E5     |
| OE:: <i>xanC</i> Δ <i>xanB</i> | 2.0E5 ± 7.3E4  | 2.9E9 ± 1.0E8   | 2.2E10 ± 9.9E8  | 3.5E6 ± 4.5E5    | 7.8E8 ± 6.2E7     | 9.5E5 ± 1.3E5     |
| OE:: <i>xanC</i> Δ <i>xanD</i> | 2.8E6 ± 8.8E5  | 2.7E9 ± 2.7E8   | 6.9E10 ± 8.3E9  | 5.4E6 ± 1.3E6    | 2.6E9 ± 4.5E8     | 9.2E4 ± 2.6E4     |
| OE:: <i>xanC</i> Δ <i>xanE</i> | 8.2E4 ± 1.1E4  | 2.7E9 ± 1.5E8   | 2.6E10 ± 1.8E9  | 1.3E7 ± 6.6E5    | 3.5E8 ± 1.3E7     | 6.6E5 ± 9.1E4     |
| OE:: <i>xanC</i> Δ <i>xanF</i> | 2.1E5 ± 1.2E4  | 2.2E9 ± 2.2E8   | 3.5E10 ± 3.9E9  | 6.9E6 ± 2.4E6    | 6.0E8 ± 5.7E7     | 4.4E5 ± 2.5E4     |
| OE:: <i>xanC</i> Δ <i>xanG</i> | 2.2E4 ± 2.0E4  | 1.7E9 ± 1.3E8   | 1.7E10 ± 1.6E9  | 8.5E6 ± 5.4E5    | 2.7E8 ± 3.8E7     | 4.0E5 ± 7.4E4     |

<sup>a</sup> Although there was no gliotoxin in *xan* strains, the very low amount detected in the wild type makes it difficult to determine if this is a significant difference or if there is negative regulation by XanC.

Table S4- *A. fumigatus* strains used in this study.

| Strain    | Brief Genotype              | Genotype                                                                                            | Reference         |
|-----------|-----------------------------|-----------------------------------------------------------------------------------------------------|-------------------|
| TFYL 81.5 | WT                          | pyrG1, argB1, fumiargB, fumipyrG, $\Delta$ akuA::mluc                                               | Throckmorton 2016 |
| TFYL 84.1 | $\Delta$ argB               | pyrG1, argB1, fumipyrG, $\Delta$ akuA::mluc                                                         | Lim 2018          |
| TFYL 80.1 | $\Delta$ pyrG               | pyrG1, argB1, fumiargB, $\Delta$ akuA::mluc                                                         | Lim 2018          |
| TFYL 45.1 | $\Delta$ pyrG $\Delta$ argB | pyrG1, argB1, $\Delta$ akuA::mluc                                                                   | Throckmorton 2016 |
| TNLR 11.3 | OE::xanC $\Delta$ argB      | pyrG1, argB1, parapyrG::gpdA(p)::AFUA_5G02655; $\Delta$ akuA::mluc                                  | This Study        |
| TNLR 9.1  | $\Delta$ xanC               | pyrG1, argB1, fumiargB, $\Delta$ AFUA_5G02655::parapyrG; $\Delta$ akuA::mluc                        | Lim 2018          |
| TNLR 1.2  | OE::xanC                    | pyrG1, argB1, fumiargB, parapyrG::gpdA(p)::AFUA_5G02655; $\Delta$ akuA::mluc                        | Lim 2018          |
| TNLR 12.1 | OE::xanC $\Delta$ xanA      | pyrG1, argB1, parapyrG::gpdA(p)::AFUA_5G02655; $\Delta$ AFUA_5G02670::fumiargB; $\Delta$ akuA::mluc | This Study        |
| TNLR 13.2 | OE::xanC $\Delta$ xanB      | pyrG1, argB1, parapyrG::gpdA(p)::AFUA_5G02655; $\Delta$ AFUA_5G02660::fumiargB; $\Delta$ akuA::mluc | This Study        |
| TNLR 20.5 | OE::xanC $\Delta$ xanD      | pyrG1, argB1, parapyrG::gpdA(p)::AFUA_5G02655; $\Delta$ AFUA_5G02650::fumiargB; $\Delta$ akuA::mluc | This Study        |
| TNLR 17.5 | OE::xanC $\Delta$ xanE      | pyrG1, argB1, parapyrG::gpdA(p)::AFUA_5G02655; $\Delta$ AFUA_5G02640::fumiargB; $\Delta$ akuA::mluc | This Study        |
| TNLR 18.6 | OE::xanC $\Delta$ xanF      | pyrG1, argB1, parapyrG::gpdA(p)::AFUA_5G02655; $\Delta$ AFUA_5G02630::fumiargB; $\Delta$ akuA::mluc | This Study        |
| TNLR 19.2 | OE::xanC $\Delta$ xanG      | pyrG1, argB1, parapyrG::gpdA(p)::AFUA_5G02655; $\Delta$ AFUA_5G02620::fumiargB; $\Delta$ akuA::mluc | This Study        |

Supplemental Table S5- Primers used to generate fungal strains.

Table S2. Primers used in this study

| Strain/Gene                        | Sequence                                                                                                                                                                                           | Primer ID                                                                                                          |
|------------------------------------|----------------------------------------------------------------------------------------------------------------------------------------------------------------------------------------------------|--------------------------------------------------------------------------------------------------------------------|
| TNLR 11.3<br>OE:: <i>xanCΔargB</i> | GTGAGCCTCGTAGCCATACC<br>TGCAGGATGCTTGTCTATGG<br>CGCCCTATAGTGAGTCGTATTACGCGCTGCTGATAATGGCCTTT<br>CGCTTGAGCAGACATCACCATGCATTACAGACTACAAAGGACGAGC<br>AACGATGACGACTGTGAAGG<br>CTCAAAGCATCATGGACTGG     | NR 6550E 5' FOR<br>NR 6550E NEST FOR<br>NR 6550E 5' REV<br>NR 6550E 3' FOR<br>NR 6550E NEST REV<br>NR 6550E 3' REV |
| TNLR 12.1<br>OE:: <i>xanCΔxanA</i> | AATTTGCTTGGATGCAGACCGGTTCCGGTGAACAATCTCTCGCCT<br>CGGCTTCAAGCTTTCAGGAACG<br>TCAAATGGATGATGGGTCTCTCTTCCGGATCTCCAAAGAGGCGATC<br>CCGAGGGTGACTTCTGCCTATC<br>GCCTCTAGCACATTGGTTG<br>CCGTCGGTATGCACGGTTTT | NR dxanA 5' REV<br>NR dxanA 5' FOR<br>NR dxanA 3' FOR<br>NR dxanA 3' REV<br>NR dxanA NEST FOR<br>NR dxanA NEST REV |
| TNLR 13.2<br>OE:: <i>xanCΔxanB</i> | GGAGTGAGCAGCTGCTTGGGA<br>CCCTTGATGTGCGCATTCA<br>CTTGGATGCAGACCGCGTTCCGAGCCAGACATAGTGAGG<br>CCTTCAAGGGCGAATTCTGCAGATGCCTTGTGCTCAGAGGGACT<br>CGTGCTGTAGTCTACTCAACCAG<br>GGAACGTCTCTCCAACC TC         | NR dxanB 5' FOR<br>NR dxanB NEST FOR<br>NR dxanB 5' REV<br>NR dxanB 3' FOR<br>NR dxanB NEST REV<br>NR dxanB 3' REV |
| TNLR 20.5<br>OE:: <i>xanCΔxanD</i> | GGGGTATGGCTACGAGGCTC<br>GGCGCGCTGGGAAGAATATT<br>CTTGGATGCAGACCGCGTTCTGTGACTGCTTGGAGCCTGG<br>AAGGGCGAATTCTGCAGATCGAATGGCTCAGCAACTGCG<br>CCGCTAGATGTGACGATGGA<br>GCGTGTCTTGTAAAGTGGAC                | NR dxanD 5' FOR<br>NR dxanD NEST FOR<br>NR dxanD 5' REV<br>NR dxanD 3' FOR<br>NR dxanD NEST REV<br>NR dxanD 5' REV |
| TNLR 17.5<br>OE:: <i>xanCΔxanE</i> | CATCCCAAGTCAGCAAATCC<br>AAGTCATCGGAAGTGTAGC<br>CTTGGATGCAGACCGCGTTCTCAGCATTGGTCGTAACCTG<br>AAGGGCGAATTCTGCAGATGCAGTTGCTGAGACCATTCCG<br>GTCTCGCCATCTCTGTCTGC<br>GCAGCCATATTTGTCTGTGG                | NR dxanE 5' FOR<br>NR dxanE NEST FOR<br>NR dxanE 5' REV<br>NR dxanE 3' FOR<br>NR dxanE NEST REV<br>NR dxanE 3' REV |
| TNLR 18.6<br>OE:: <i>xanCΔxanF</i> | CGGGAAAATTGAAGAACAGC<br>CACAGACTGGATGGCTTCG<br>CTTGGATGCAGACCGCGTTCCAGCGTTCGATTGGTTACGG<br>AAGGGCGAATTCTGCAGATCGCCGAGATTTGATAAAGG<br>TCGCTCTGAGTGTGTGACG<br>AGGAAGTCAACGACACTCC                    | NR dxanF 5' FOR<br>NR dxanF NEST FOR<br>NR dxanF 5' REV<br>NR dxanF 3' FOR<br>NR dxanF NEST REV<br>NR dxanF 3' REV |
| TNLR 19.2<br>OE:: <i>xanCΔxanG</i> | CTGTGGAATCCAATCCAACC<br>CTGCAGCTCTCTTCCAACC<br>CTTGGATGCAGACCGCGTTCTCAGTGTGGTGCAGTAGC<br>AAGGGCGAATTCTGCAGATGAGCGAGGTC AAGGAGAGC<br>CATGCTCTGCTCTTTGACC<br>GCAGCGAATTAACGTGACG                     | NR dxanG 5' FOR<br>NR dxanG NEST FOR<br>NR dxanG 5' REV<br>NR dxanG 3' FOR<br>NR dxanG NEST REV<br>NR dxanG 3' REV |
| <i>xanB</i>                        | CCATTGAGCGAAGTTGATCG<br>TCGATGACTTTCAGGACAGC                                                                                                                                                       | NR xanB semiq FOR<br>NR xanB semiq REV                                                                             |
| <i>act1</i>                        | CTCCAGCCTAGCGTTCT<br>GTACATGGTGGTACCACCAG                                                                                                                                                          | MN_act1_FOR<br>MN_act1_REV                                                                                         |

1. E. Szewczyk, *et al.*, Fusion PCR and gene targeting in *Aspergillus nidulans* (Nature Protocol (2007) (3111-3120) 10.1038/nprot.2006.405). *Nat. Protoc.* **1**, 3111–3121 (2007).
2. A. M. Calvo, J. Bok, W. Brooks, N. P. Keller, veA is required for toxin and sclerotial production in *Aspergillus parasiticus*. *Appl. Environ. Microbiol.* **70**, 4733–4739 (2004).
3. R. Sekonyela, *et al.*, RsmA Regulates *Aspergillus fumigatus* Gliotoxin Cluster Metabolites Including Cyclo(L-Phe-L-Ser), a Potential New Diagnostic Marker for Invasive Aspergillosis. *PLoS One* **8**, 1–10 (2013).
4. K. Shimizu, N. P. Keller, Genetic Involvement of a cAMP-Dependent Protein Kinase in a G Protein Signaling Pathway Regulating Morphological and Chemical Transitions in *Aspergillus nidulans* (2001).
5. P. Wiemann, *et al.*, *Aspergillus fumigatus* Copper Export Machinery and Reactive Oxygen Intermediate Defense Counter Host Copper-Mediated Oxidative Antimicrobial Offense. *Cell Rep.* **19**, 1008–1021 (2017).
6. J. A. L. Figueroa, C. A. Stiner, T. L. Radzyukevich, J. A. Heiny, Metal ion transport quantified by ICP-MS in intact cells. *Sci. Rep.* **6**, 1–7 (2016).
7. T. Yamaguchi, Y. Miyake, A. Miyamura, N. Ishiwata, K. Tatsuta, Structure-activity relationships of xanthocillin derivatives as thrombopoietin receptor agonist. *J. Antibiot. (Tokyo)*. **59**, 729–734 (2006).
